# Supplementary material for: Epidemiology of genital human papillomavirus infections in sequential male sex partners of young females
Source: bioRxiv or medRxiv preprint supplement (doi:10.1101/2023.06.19.23291543), 2023-06-20
Supplement: Supplementary file [file media-1.pdf]

## SUPPLEMENTAL MATERIAL

**Table S1.** Agreement between sample collection sites and visits in males for type-specific HPV positivity, overall and by subgenus.<sup>a</sup>

|                   | Penile and Scrotal Samples at Baseline |    |    |    |                    | Penile and Scrotal Samples at Follow-up |    |    |    |                    | Baseline and Follow-up: Combined Genital Site(s) |    |    |    |                    |
|-------------------|----------------------------------------|----|----|----|--------------------|-----------------------------------------|----|----|----|--------------------|--------------------------------------------------|----|----|----|--------------------|
|                   | --                                     | -+ | +- | ++ | Kappa <sup>b</sup> | --                                      | -+ | +- | ++ | Kappa <sup>b</sup> | --                                               | -+ | +- | ++ | Kappa <sup>b</sup> |
| <b>Male 1</b>     |                                        |    |    |    |                    |                                         |    |    |    |                    |                                                  |    |    |    |                    |
| <b>Overall</b>    | 591                                    | 5  | 15 | 37 | 0.77               | 712                                     | 6  | 18 | 20 | 0.61               | 1154                                             | 18 | 27 | 61 | 0.71               |
| <b>Subgenus 1</b> | 98                                     | 1  | 3  | 6  | 0.73               | 116                                     | 1  | 5  | 4  | 0.55               | 190                                              | 3  | 6  | 11 | 0.69               |
| <b>Subgenus 2</b> | 362                                    | 1  | 11 | 22 | 0.77               | 435                                     | 4  | 13 | 10 | 0.52               | 706                                              | 12 | 15 | 37 | 0.71               |
| <b>Subgenus 3</b> | 131                                    | 3  | 1  | 9  | 0.80               | 161                                     | 1  | 0  | 6  | 0.92               | 258                                              | 3  | 6  | 13 | 0.73               |
| <b>Male 2</b>     |                                        |    |    |    |                    |                                         |    |    |    |                    |                                                  |    |    |    |                    |
| <b>Overall</b>    | 497                                    | 4  | 22 | 17 | 0.54               | 168                                     | 1  | 2  | 9  | 0.85               | 999                                              | 37 | 26 | 54 | 0.60               |
| <b>Subgenus 1</b> | 82                                     | 0  | 4  | 4  | 0.65               | 29                                      | 0  | 0  | 1  | 1.00               | 164                                              | 4  | 4  | 14 | 0.75               |
| <b>Subgenus 2</b> | 303                                    | 3  | 15 | 9  | 0.47               | 100                                     | 1  | 2  | 7  | 0.81               | 609                                              | 25 | 17 | 31 | 0.56               |
| <b>Subgenus 3</b> | 112                                    | 1  | 3  | 4  | 0.65               | 39                                      | 0  | 0  | 1  | 1.00               | 226                                              | 8  | 5  | 9  | 0.55               |

Abbreviation: HPV, human papillomavirus.

<sup>a</sup> Subgenus 1 includes low oncogenic risk mucosal HPVs 6, 11, 40, 42, 44, and 54; subgenus 2 includes high oncogenic risk mucosal HPVs 16, 18, 26, 31, 33, 35, 39, 45, 51, 52, 53, 56, 58, 59, 66, 67, 68, 69, 70, 73 and 82; and subgenus 3 includes commensal mucocutaneous HPVs 61, 62, 71, 72, 81, 83, 84 and 89 [18, 19].

<sup>b</sup> Kappa values 0.41-0.60 indicate moderate, 0.61-0.80 substantial, and 0.81-1.00 almost perfect agreement [17].

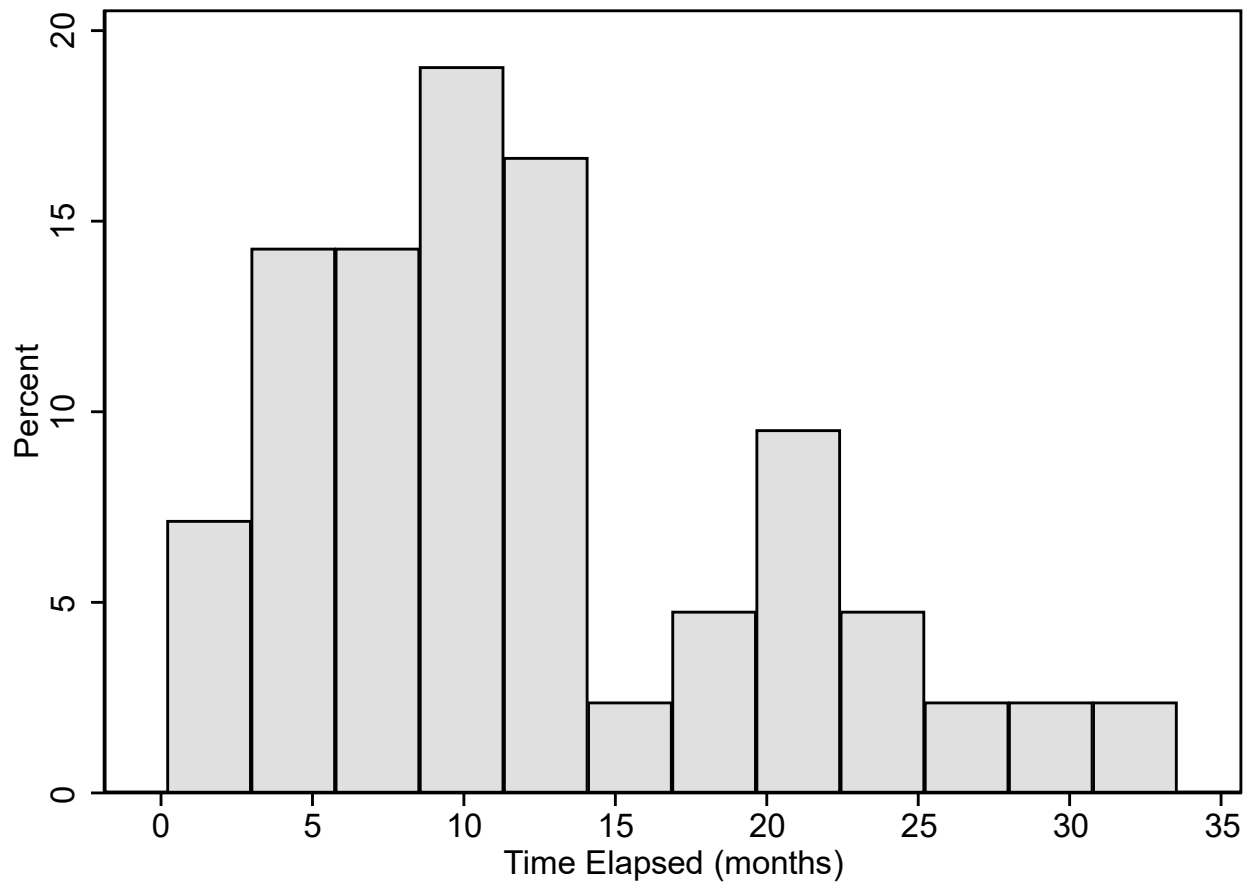

**Figure S1.** Distribution of time elapsed between male 1 last available sample and male 2 baseline sample within linked partnerships.

**Figure S1 Legend:** While all male 2 provided a baseline genital sample, male 1 follow-up visits did not begin until October 2006. As such, we measured the time between available male 1 and male 2 genital samples based on the final sample male 1 provided. When male 1 provided a follow-up sample, we measured the time between male 1 follow-up and male 2 baseline; otherwise, we measured the time between male 1 baseline and male 2 baseline.

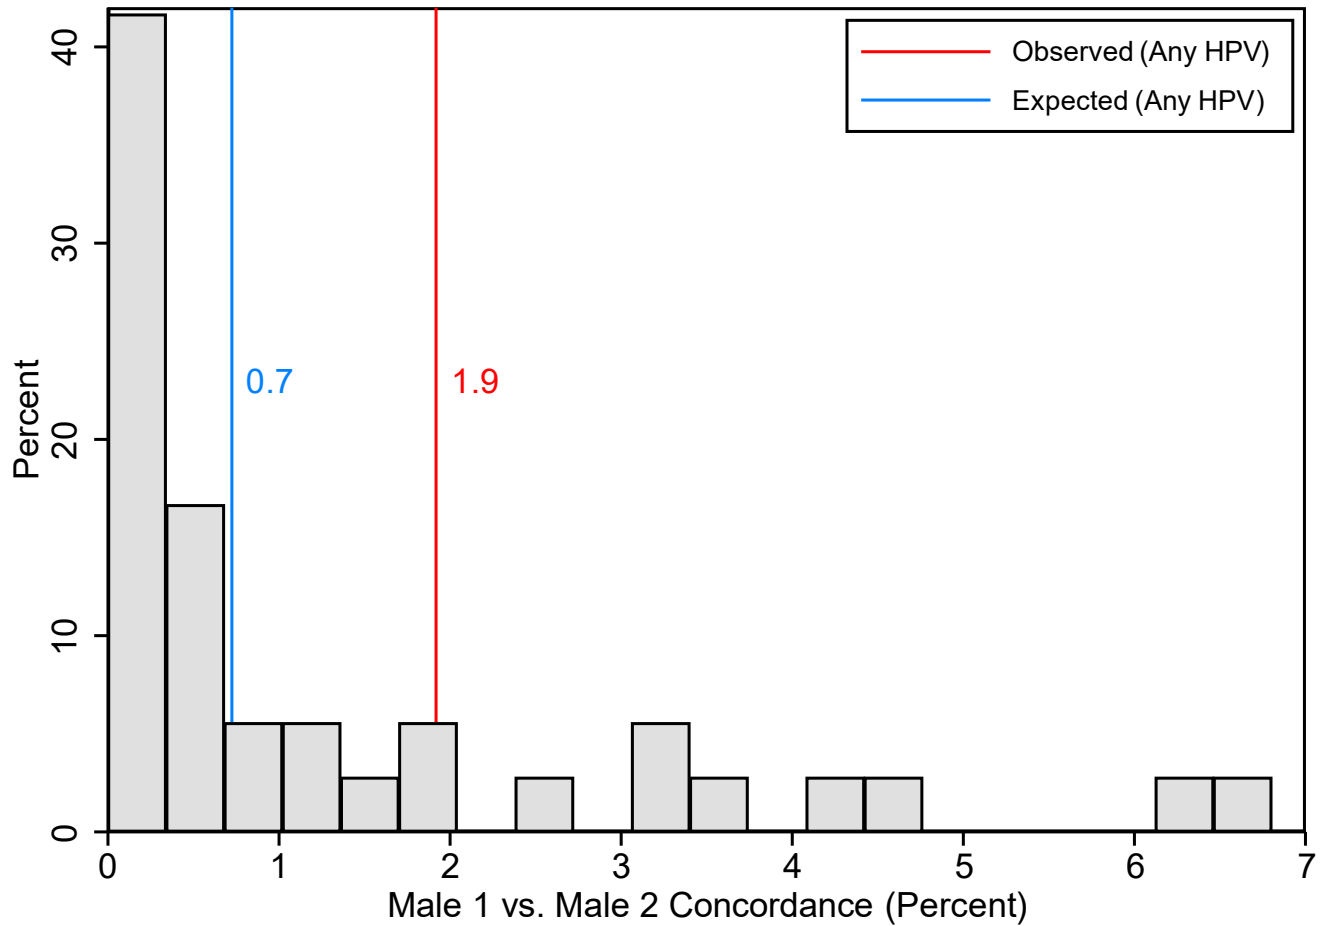

**Figure S2.** Type-specific expected human papillomavirus (HPV) concordance between males 1 and 2.

**Figure S2 Legend:** Distribution of expected concordance for 36 individual HPV types. Assuming the HPV positivity of males 1 and 2 is independent, the number of infections for which males 1 and 2 are expected to be concordant is equal to the product of the infection prevalence, divided by the total detectable infections (i.e.,  $\frac{P_{HPVx, Male1} \times P_{HPVx, Male2}}{T_{HPVx}}$ ).
